# Supplementary material for: Predicting Neurobehavioral Outcomes in People with HIV
Source: Research Square preprint supplement (doi:10.21203/rs.3.rs-5618870/v1), 2025-03-27
Supplement: Supplementary file 1 [file 01fbd8f0d6c8451eac052b0e.docx]

**Supplementary Figure 1**. Proportions on ART and viral suppression rates over time by phenotype.

**Supplementary Figure 2**. Longitudinal trajectories for participants with viral suppression (left) and all participants (right).

# Supplementary Tables and Figures

# *Supplementary Table 1*

**Supplementary Table 1**. Baseline neurocognitive performance, self-reported cognitive symptoms (PAOFI), and dependence in instrumental activities of daily living (IADLs).

|  | | Phenotype 1 | Phenotype 2 | Phenotype 3 | Phenotype 4 | p | Pairwisec |
| --- | --- | --- | --- | --- | --- | --- | --- |
| **Characteristics** | | (n=231) | (n=108) | (n=97) | (n=70) |  |  |
| ***Cognition*** | |  |  |  |  |  |  |
| Global scaled score | | 9.6 (1.69) | 8.01 (1.66) | 9 (1.76) | 7.27 (1.61) | **<.001** | 1>2, 3, 4 |
| Neurocognitive global deficit scorea | | 0.25 (0.26) | 0.59 (0.44) | 0.32 (0.33) | 0.96 (0.59) | **<.001** | 2, 4>1 |
| Global T-score | | 49.7 (4.96) | 44.6 (5.26) | 48.4 (5.17) | 40.4 (5) | **<.001** | 1>2, 3, 4 |
| Cognitive impairment | | 41 (17.8%) | 51 (47.2%) | 23 (23.7%) | 55 (78.6%) | **<.001** | 1>2, 4 |
| ***Psychiatric*** | | | | | | | |
| BDI-II Total scorea | | 7.29 (5.84) | 21.9 (10.4) | 21.3 (10.9) | 11.6 (10.6) | **<.001** | 2, 3, 4 >1 |
| Lifetime MDD | | 83 (35.9%) | 76 (70.4%) | 67 (69.1%) | 37 (52.9%) | **<.001** | 2, 3, 4>1 |
| ***Daily Functioning*** | | | | | | | |
| Total PAOFI scorea |  | 1.49 (2.12) | 11.5 (7.7) | 8.75 (7.76) | 5.66 (8.24) | **<.001** | 2, 3, 4>1 |
| PAOFI symptoms (total score | ≥ 𝟑) | 49 (21.2%) | 100 (92.6%) | 75 (77.3%) | 32 (45.7%) | **<.001** | 2, 3, 4>1 |
| IADL Dependence (total score | ≥ 𝟐) | 51 (2.08%) | 75 (69.4%) | 58 (59.8%) | 27 (38.6%) | **<.001** | 2, 3, 4>1 |
| Total IADL scorea |  | 0.91 (1.26) | 3.21 (2.69) | 2.68 (2.53) | 1.87 (2.3) | **<.001** | 2, 3, 4>1 |

Note: asquare root and blog10 transformations before comparative analysis, raw values reported in the table; IADL = instrumental activities of daily living; PAOFI=assessment of own functioning inventory; Values are mean (standard deviation) or number of cases (%); cThree pairs comparisons (2, 3, and 4 vs. 1, where 1= Phenotype 1; 2= Phenotype 2; 3= Phenotype 3; 4= Phenotype 4) were performed and adjusted using the Benjamini Hochberg (BH) procedure for multiple comparisons (k=3); dAdding comparisons between Phenotypes 2, 3, 4 (k=6).

*Supplementary Table 2*

Multivariable odds for baseline medical and psychiatric characteristics comparing phenotypes, excluding education as a covariate (see **Table 3**)

| **Characteristics** | Phenotype 2 | p | Phenotype 3 | p | Phenotype 4 | p |
| --- | --- | --- | --- | --- | --- | --- |
| **Duration of HIV infection** |  |  |  |  |  |  |
| **(years)** | 1.02 (0.97, 1.06) | 0.47 | 1.02 (0.97, 1.07) | 0.41 | **1.07 (1.02, 1.13)** | **0.005** |
| **CPD** | 1.86 (0.74, 4.65) | 0.18 | 2.44 (0.99, 6.00) | 0.052 | **4.42 (1.80, 10.9)** | **0.001** |
| **LT any SUD** | 1.64 (0.95, 2.82) | 0.074 | **2.95 (1.54, 5.64)** | **0.001** | 1.04 (0.56, 1.94) | 0.9 |
| **DNP** | **1.34 (1.07, 1.69)** | **0.011** | **1.31 (1.04, 1.65)** | **0.024** | 1.18 (0.90, 1.54) | 0.24 |
| **CCI** | 0.76 (0.36, 1.57) | 0.45 | 2.51 (1.09, 5.79) | 0.031 | 1.33 (0.51, 3.43) | 0.56 |
| **Creatininea (mg/dL)** | 0.31 (0.032, 2.98) | 0.31 | **0.048 (0.004, 0.55)** | **0.015** | **0.042 (0.003, 0.65)** | **0.023** |
| **Polypharmacyb** | **1.89 (1.37, 2.61)** | **<0.001** | **1.62 (1.16, 2.26)** | **0.005** | **2.48 (1.68, 3.65)** | **<0.001** |

*Supplementary Figure 1*

| **Supplementary Figure 1**. Antiretroviral therapy use and viral suppression rates by phenotype. Rates of both increased across the study period and were similar for all phenotypes.  *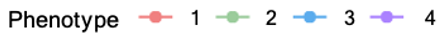* 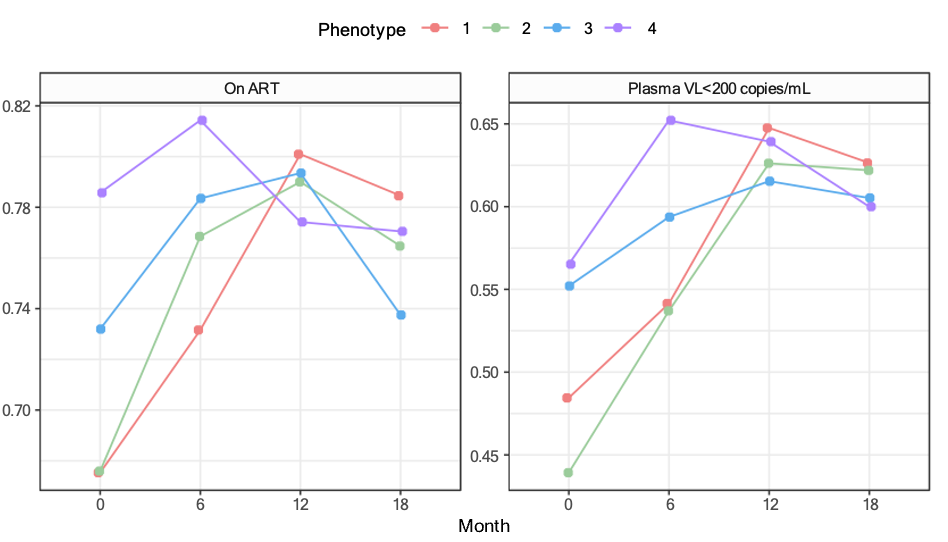  Proportion of participants |
| --- |
|  |

| **Supplementary Figure 2**. Longitudinal trajectories of neurocognitive performance, depression symptom severity, cognitive complaints, and instrumental activities of daily living were similar for participants with viral suppression (left) and all participants (right).  *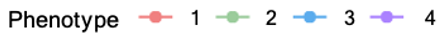*  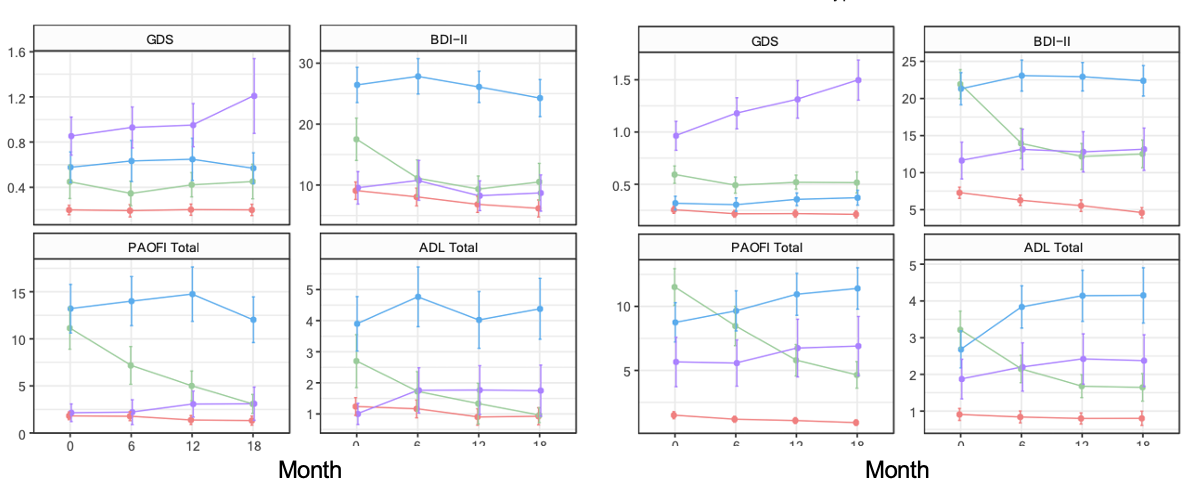 |
| --- |
